# Supplementary material for: Evaluation of Two Simultaneous Metabolomic and Proteomic Extraction Protocols Assessed by Ultra-High-Performance Liquid Chromatography Tandem Mass Spectrometry
Source: MDPI journal article supplement (doi:10.3390/ijms24021354), 2023-01-10
Supplement: s1 [file s1]

### Supplementary Figure S1

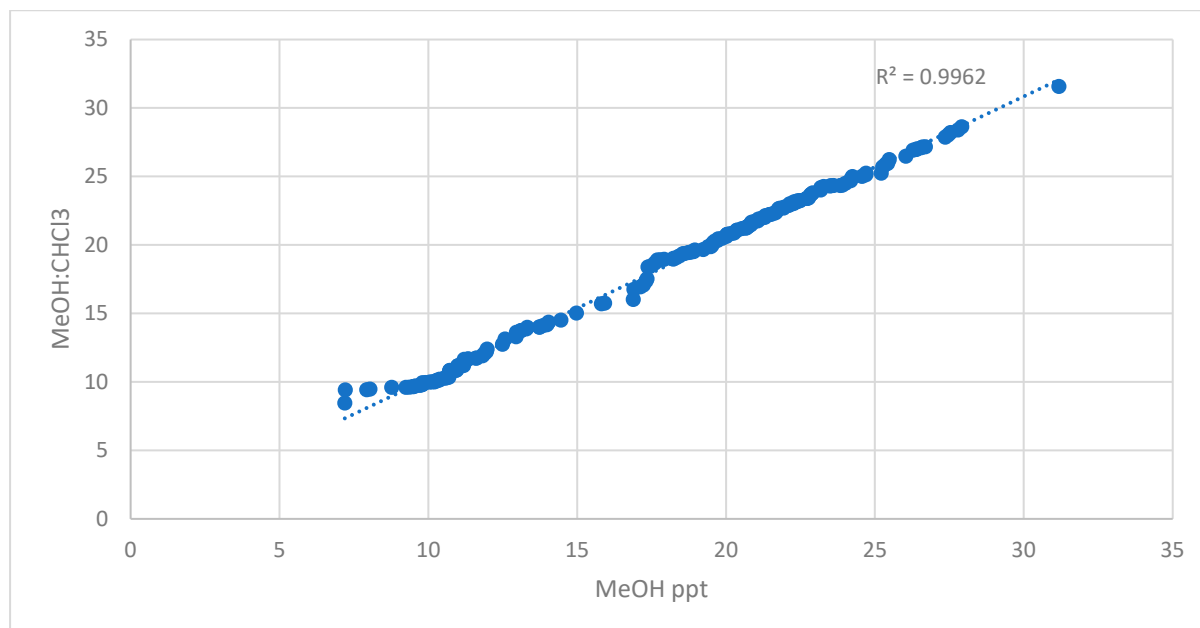

**Figure S1.** Scatter plot that presents the correlation between the metabolites and proteins for both extraction methods, X-axis indicates log2-transformed average intensities of metabolites and proteins extracted by MeOH-Only Method. Y-axis indicates log2-transformed average intensities of metabolites and proteins extracted by MeOH:CHCl<sub>3</sub> Method.
